# Supplementary material for: Incidence and costs of cardiovascular events in Spanish patients with type 2 diabetes mellitus: a comparison with general population, 2015
Source: PubMed Central journal article supplement — BMJ Open Diabetes Res Care. 2020 Aug 2;8(1):e001130. doi: 10.1136/bmjdrc-2019-001130 (PMC7398090; doi:10.1136/bmjdrc-2019-001130), 2020-08-02
Supplement: bmjdrc-2019-001130supp001.pdf [file bmjdrc-2019-001130supp001.pdf]

## SUPPLEMENTARY MATERIAL

**Table A1.** Definition of CV complications (ICD-9-MC)\*,‡

|                                      | SPANISH ICD CODES (ICD-9-MC)                                                                                                                                                                                                             |
|--------------------------------------|------------------------------------------------------------------------------------------------------------------------------------------------------------------------------------------------------------------------------------------|
| <b>CV COMPLICATIONS</b>              |                                                                                                                                                                                                                                          |
| <b>Death due to CV event</b>         | 410.xx; 427.5; 398.91; 411.xx; 428.xx; 346.6; 435.x; 436.xx; 437.1; 414.02; 414.03; 414.04; 414.06; 414.07; 996.0; 249.7; 250.7; 415.1; 433.xx; 434.xx; 440.xx; 443.xx; 444.xx; 445.xx; 447.1; 557.0; 593.81; 785.50; 17.55; 39.2; 38.08 |
| <b>Non-fatal AMI</b>                 | 410.xx                                                                                                                                                                                                                                   |
| <b>Non-fatal stroke</b>              | 346.6; 431.xx; 432.xx; 432.9; 433.x1; 434.x1; 435.xx; 436.xx; 437.1                                                                                                                                                                      |
| <b>Unstable angina</b>               | 413.xx                                                                                                                                                                                                                                   |
| <b>Heart failure</b>                 | 398.91; 404.11; 404.13; 411.89; 433.x1; 428.xx                                                                                                                                                                                           |
| <b>Revascularisation</b>             | 00.66; 17.55; 36.x                                                                                                                                                                                                                       |
| <b>RISK FACTORS</b>                  |                                                                                                                                                                                                                                          |
| <b>Smoker</b>                        | 305.1x, V15.82                                                                                                                                                                                                                           |
| <b>Obesity</b>                       | 278.xx                                                                                                                                                                                                                                   |
| <b>Hypertension</b>                  | 401.xx                                                                                                                                                                                                                                   |
| <b>Disorders of lipid metabolism</b> | 272.4                                                                                                                                                                                                                                    |

\* Indicated with .x or .xx when all available digits for that code are included.

ICD-9-MC, Spanish international classification of disease, ninth revision, clinical modification; CV, cardiovascular; AMI, acute myocardial infarction.

‡ Codes selected in consultation with a documentalist expert in codification and with the collaboration of a group of clinical experts, based on the description of these CV complications in the SUSTAIN-6 study [52].

**Table A2.** Socio-demographic and epidemiological characteristics of hospitalised patients according to presence of T2DM – Unmatched T2DM and Non-DM groups.

|                                                | T2DM                   | Non-DM                  |
|------------------------------------------------|------------------------|-------------------------|
| <b>Hospital discharges - N (%)</b>             | <b>96 122 (34.71%)</b> | <b>180 803 (65.29%)</b> |
| <b>Patients – n</b>                            | 83 591                 | 163 531                 |
| <b>Gender - n (%) <sup>a</sup></b>             |                        |                         |
| Men                                            | 54 722 (56.93%)        | 103 386 (57.18%)        |
| Women                                          | 41 398 (43.07%)        | 77 411 (42.82%)         |
| <b>Age [years]</b>                             |                        |                         |
| Mean (SD)                                      | 75.37 (10.91)          | 74.37 (13.68)           |
| Median [Q1; Q3]                                | 77.00 [68.00;83.00]    | 78.00 [65.00;85.00]     |
| <b>Age [years] - n (%)</b>                     |                        |                         |
| 35-60                                          | 10 635 (11.06%)        | 33 452 (18.50%)         |
| 61-70                                          | 18 518 (19.27%)        | 29 181 (16.14%)         |
| 71-80                                          | 30 872 (32.12%)        | 43 891 (24.28%)         |
| ≥81                                            | 36 097 (37.55%)        | 74 279 (41.08%)         |
| <b>Smoker - n (%)</b>                          | 22 930 (23.86%)        | 51 060 (28.24%)         |
| <b>Obesity - n (%)</b>                         | 16 583 (17.25%)        | 17 103 (9.46%)          |
| <b>Hypertension - n (%)</b>                    | 53 714 (55.88%)        | 82 154 (45.44%)         |
| <b>Disorders of lipid metabolism - n (%)</b>   | 40 729 (42.37%)        | 49 795 (27.54%)         |
| <b>Charlson Comorbidity Index <sup>b</sup></b> |                        |                         |
| Low                                            | 9 130 (9.50%)          | 18 617 (10.30%)         |
| Medium                                         | 55 095 (57.32%)        | 115 355 (63.80%)        |
| High                                           | 31 897 (33.18%)        | 46 831 (25.90%)         |
| <b>LOHS [days]</b>                             |                        |                         |
| Mean (SD)                                      | 8.19 (7.98)            | 8.02 (9.30)             |
| Median [Q1; Q3]                                | 6.00 [4.00;10.00]      | 6.00 [3.00;10.00]       |
| <b>Direct costs APR-DRG [euros]</b>            |                        |                         |
| Mean (SD)                                      | € 5908 (4952)          | € 6194 (6622)           |
| Median [Q1; Q3]                                | € 4753 [3859;6169]     | € 4753 [3859;6913]      |

a. No data on 8 hospital discharges.

b. Low: no disease; Medium: 1-2 diseases; High: 3 or more diseases.

DM, diabetes mellitus; LOHS, length of hospital stay; T2DM, type 2 diabetes mellitus; SD, standard deviation; Q1, first quartile; Q3, third quartile.

**Table A3.** Socio-demographic and epidemiological characteristics of hospitalised patients according to CV complications and presence of T2DM – Matched T2DM and Non-DM groups.

|                                               | Death from CV cause  |                      |                  | Non-fatal AMI          |                        |                  | Non-fatal stroke       |                        |                  |
|-----------------------------------------------|----------------------|----------------------|------------------|------------------------|------------------------|------------------|------------------------|------------------------|------------------|
|                                               | T2DM                 | Non-DM               | p-value          | T2DM                   | Non-DM                 | p-value          | T2DM                   | Non-DM                 | p-value          |
| <b>Hospital discharges - N (%)</b>            | <b>8258 (50.00%)</b> | <b>8258 (50.00%)</b> | <i>NA</i>        | <b>14 195 (50.00%)</b> | <b>14 195 (50.00%)</b> | <i>NA</i>        | <b>20 102 (50.00%)</b> | <b>20 102 (50.00%)</b> | <i>NA</i>        |
| <b>Gender - n (%)</b>                         |                      |                      |                  |                        |                        |                  |                        |                        |                  |
| Men                                           | 3914 (47.40%)        | 3914 (47.40%)        | 1                | 9920 (69.88%)          | 9920 (69.88%)          | 1                | 11 440 (56.91%)        | 11 440 (56.91%)        | 1                |
| Women                                         | 4344 (52.60%)        | 4344 (52.60%)        |                  | 4275 (30.12%)          | 4275 (30.12%)          |                  | 8662 (43.09%)          | 8662 (43.09%)          |                  |
| <b>Age [years]</b>                            |                      |                      |                  |                        |                        |                  |                        |                        |                  |
| Mean (SD)                                     | 81.52 (8.79)         | 81.52 (8.79)         | 1                | 70.51 (11.82)          | 70.51 (11.82)          | 1                | 75.01 (10.59)          | 75.01 (10.59)          | 1                |
| Median [Q1; Q3]                               | 83.00[77.00;88.00]   | 83.00[77.00;88.00]   |                  | 72.00[62.00;80.00]     | 72.00[62.00;80.00]     |                  | 77.00[68.00;83.00]     | 77.00[68.00;83.00]     |                  |
| <b>Age [years] - n (%)</b>                    |                      |                      |                  |                        |                        |                  |                        |                        |                  |
| 35-60                                         | 250 (3.03%)          | 250 (3.03%)          | 1                | 3153 (22.21%)          | 3153 (22.21%)          | 1                | 2182 (10.85%)          | 2182 (10.85%)          | 1                |
| 61-70                                         | 681 (8.25%)          | 681 (8.25%)          |                  | 3525 (24.83%)          | 3525 (24.83%)          |                  | 3949 (19.64%)          | 3949 (19.64%)          |                  |
| 71-80                                         | 2182 (26.42%)        | 2182 (26.42%)        |                  | 4164 (29.33%)          | 4164 (29.33%)          |                  | 6945 (34.55%)          | 6945 (34.55%)          |                  |
| ≥81                                           | 5145 (62.30%)        | 5145 (62.30%)        |                  | 3353 (23.62%)          | 3353 (23.62%)          |                  | 7026 (34.95%)          | 7026 (34.95%)          |                  |
| <b>Smoker - n (%)</b>                         | 996 (12.06%)         | 1010 (12.23%)        | 0.760            | 5447 (38.37%)          | 6228 (43.87%)          | <b>&lt;0.001</b> | 4474 (22.26%)          | 4979 (24.77%)          | <b>&lt;0.001</b> |
| <b>Obesity - n (%)</b>                        | 968 (11.72%)         | 495 (5.99%)          | <b>&lt;0.001</b> | 2607 (18.37%)          | 1510 (10.64%)          | <b>&lt;0.001</b> | 2327 (11.58%)          | 1248 (6.21%)           | <b>&lt;0.001</b> |
| <b>Hypertension - n (%)</b>                   | 3967 (48.04%)        | 3166 (38.34%)        | <b>&lt;0.001</b> | 8333 (58.70%)          | 6854 (48.28%)          | <b>&lt;0.001</b> | 13 387 (66.6%)         | 10 956 (54.5%)         | <b>&lt;0.001</b> |
| <b>Disorders of lipid metabolism - n (%)</b>  | 2671 (32.34%)        | 1456 (17.63%)        | <b>&lt;0.001</b> | 6853 (48.28%)          | 5034 (35.46%)          | <b>&lt;0.001</b> | 8569 (42.63%)          | 5822 (28.96%)          | <b>&lt;0.001</b> |
| <b>Charlson Comorbidity Index<sup>a</sup></b> |                      |                      |                  |                        |                        |                  |                        |                        |                  |
| Low                                           | 3410 (41.29%)        | 3830 (41.29%)        | <b>&lt;0.001</b> | 7958 (56.06%)          | 9423 (66.38%)          | <b>&lt;0.001</b> | 10 338 (51.43%)        | 10 959 (54.52%)        | <b>0.010</b>     |
| Medium                                        | 3564 (43.16%)        | 3204 (38.80%)        |                  | 4310 (30.36%)          | 3537 (24.92%)          |                  | 7412 (36.87%)          | 6981 (34.73%)          |                  |
| High                                          | 1284 (15.55%)        | 1224 (14.82%)        |                  | 1927 (13.58%)          | 1235 (8.70%)           |                  | 2352 (11.70%)          | 2162 (10.76%)          |                  |

a. Low: no disease; Medium: 1-2 diseases; High: 3 or more diseases.

CV, cardiovascular; AMI, acute myocardial infarction; DM, diabetes mellitus; T2DM, type 2 diabetes mellitus; SD, standard deviation; Q1, first quartile; Q3, third quartile; NA, not applicable.

**Table A3. Continued:** Socio-demographic and epidemiological characteristics of hospitalised patients according to CV complications and presence of T2DM – Matched T2DM and Non-DM groups.

|                                                | Unstable angina        |                        |                  | Heart failure          |                        |                  | Revascularisation      |                        |                  |
|------------------------------------------------|------------------------|------------------------|------------------|------------------------|------------------------|------------------|------------------------|------------------------|------------------|
|                                                | T2DM                   | Non-DM                 | p-value          | T2DM                   | Non-DM                 | p-value          | T2DM                   | Non-DM                 | p-value          |
| <b>Hospital discharges - N (%)</b>             | <b>2082 (50.00%)</b>   | <b>2082 (50.00%)</b>   | <i>NA</i>        | <b>40 684 (50.00%)</b> | <b>40 684 (50.00%)</b> | <i>NA</i>        | <b>20 054 (50.00%)</b> | <b>20 054 (50.00%)</b> | <i>NA</i>        |
| <b>Gender - n (%)</b>                          |                        |                        |                  |                        |                        |                  |                        |                        |                  |
| Men                                            | 1259 (60.47%)          | 1259 (60.47%)          | 1                | 19 718 (48.47%)        | 19 718 (48.47%)        | 1                | 15 046 (75.03%)        | 15 046 (75.03%)        | 1                |
| Women                                          | 823 (39.53%)           | 823 (39.53%)           |                  | 20 966 (51.53%)        | 20 966 (51.53%)        |                  | 5008 (24.97%)          | 5008 (24.97%)          |                  |
| <b>Age [years]</b>                             |                        |                        |                  |                        |                        |                  |                        |                        |                  |
| Mean (SD)                                      | 71.94 (10.52)          | 71.94 (10.52)          | 1                | 78.97 (9.42)           | 78.97 (9.42)           | 1                | 68.46 (10.44)          | 68.46 (10.44)          | 1                |
| Median [Q1; Q3]                                | 73.00<br>[65.00;80.00] | 73.00<br>[65.00;80.00] |                  | 81.00<br>[74.00;86.00] | 81.00<br>[74.00;86.00] |                  | 69.00<br>[61.00;77.00] | 69.00<br>[61.00;77.00] |                  |
| <b>Age [years] - n(%)</b>                      |                        |                        |                  |                        |                        |                  |                        |                        |                  |
| 35-60                                          | 329 (15.80%)           | 329 (15.80%)           | 1                | 1997 (4.91%)           | 1997 (4.91%)           | 1                | 4789 (23.88%)          | 4789 (23.88%)          | 1                |
| 61-70                                          | 563 (27.04%)           | 563 (27.04%)           |                  | 5200 (12.78%)          | 5200 (12.78%)          |                  | 6229 (31.06%)          | 6229 (31.06%)          |                  |
| 71-80                                          | 682 (32.76%)           | 682 (32.76%)           |                  | 12 779 (31.41%)        | 12 779 (31.41%)        |                  | 6327 (31.55%)          | 6327 (31.55%)          |                  |
| ≥81                                            | 508 (24.40%)           | 508 (24.40%)           |                  | 20 708 (50.90%)        | 20 708 (50.90%)        |                  | 2709 (13.51%)          | 2709 (13.51%)          |                  |
| <b>Smoker - n (%)</b>                          | 600 (28.82%)           | 678 (32.56%)           | <b>&lt;0.001</b> | 6534 (16.06%)          | 7241 (17.80%)          | <b>&lt;0.001</b> | 8359 (41.68%)          | 9228 (46.02%)          | <b>&lt;0.001</b> |
| <b>Obesity - n (%)</b>                         | 393 (18.88%)           | 227 (10.90%)           | <b>&lt;0.001</b> | 7928 (19.49%)          | 4945 (12.15%)          | <b>&lt;0.001</b> | 3789 (18.89%)          | 2186 (10.9%)           | <b>&lt;0.001</b> |
| <b>Hypertension - n (%)</b>                    | 1302 (62.54%)          | 1089 (52.31%)          | <b>&lt;0.001</b> | 19 235 (47.28%)        | 16 519 (40.6%)         | <b>&lt;0.001</b> | 12 509 (62.38%)        | 10 004 (49.89%)        | <b>&lt;0.001</b> |
| <b>Disorders of lipid metabolism - n (%)</b>   | 1074 (51.59%)          | 789 (37.90%)           | <b>&lt;0.001</b> | 15 067 (37.03%)        | 9084 (22.33%)          | <b>&lt;0.001</b> | 10 627 (52.99%)        | 7924 (39.51%)          | <b>&lt;0.001</b> |
| <b>Charlson Comorbidity Index <sup>a</sup></b> |                        |                        |                  |                        |                        |                  |                        |                        |                  |
| Low                                            | 1050 (50.43%)          | 1247 (59.89%)          | <b>&lt;0.001</b> | 14 425 (35.46%)        | 17 037 (41.88%)        | <b>&lt;0.001</b> | 3810 (19.00%)          | 3613 (19.00%)          | <b>&lt;0.001</b> |
| Medium                                         | 786 (37.75%)           | 670 (32.18%)           |                  | 19 121 (47.00%)        | 17 336 (42.61%)        |                  | 13 022 (64.93%)        | 14 277 (71.19%)        |                  |
| High                                           | 246 (11.82%)           | 165 (7.93%)            |                  | 7138 (17.54%)          | 6311 (15.51%)          |                  | 3222 (16.07%)          | 2164 (10.79%)          |                  |

---

a. Low: no disease; Medium: 1-2 diseases; High: 3 or more diseases. CV, cardiovascular; AMI, acute myocardial infarction; DM, diabetes mellitus; T2DM, type 2 diabetes mellitus; SD, standard deviation; Q1, first quartile; Q3, third quartile; NA, not applicable.

**Table A4.** LOHS and APR-DRG direct costs of hospital discharges attributable to CV complications by DM status and age – Matched T2DM and Non-DM groups–

|                     |                 | Age [years]             |                  |                  |                  |                                        |                      |                      |                  |
|---------------------|-----------------|-------------------------|------------------|------------------|------------------|----------------------------------------|----------------------|----------------------|------------------|
|                     |                 | 35-60                   | 61-70            | 71-80            | ≥81              | 35-60                                  | 61-70                | 71-80                | ≥81              |
|                     |                 | LOHS [days] (mean [SD]) |                  |                  |                  | Direct costs APR-DRG [euros] mean (SD) |                      |                      |                  |
| Death from CV cause | N*              | 250                     | 681              | 2182             | 5145             | 250                                    | 681                  | 2182                 | 5145             |
|                     | T2DM            | 9.75<br>(13.33)         | 11.35<br>(15.31) | 9.88<br>(11.55)  | 7.9<br>(8.72)    | € 13 011<br>(15 805)                   | € 10 686<br>(12 375) | € 8567<br>(9858)     | € 6007<br>(4148) |
|                     | Non-DM          | 11.80<br>(29.66)        | 12.53<br>(17.59) | 11.09<br>(14.10) | 8.14<br>(9.56)   | € 20 107<br>(28 027)                   | € 14 163<br>(18 736) | € 10 953<br>(15 445) | € 6333<br>(6495) |
|                     | T2DM vs. Non-DM | -17.37%                 | -9.42%           | -10.91%          | -2.95%           | -35.29%                                | -24.55%              | -21.78%              | -5.16%           |
|                     | p-value         | 0.696                   | 0.240            | 0.158            | 0.582            | 0.102                                  | <b>0.002</b>         | <b>&lt;0.001</b>     | 0.578            |
| Non-fatal AMI       | N*              | 3153                    | 3525             | 4164             | 3353             | 3153                                   | 3525                 | 4164                 | 3353             |
|                     | T2DM            | 6.28<br>(5.79)          | 7.72<br>(7.37)   | 8.25<br>(7.33)   | 8.03<br>(5.96)   | € 7350<br>(5655)                       | € 7305<br>(5120)     | € 6951<br>(4558)     | € 5950<br>(2869) |
|                     | Non-DM          | 5.81<br>(7.34)          | 6.57<br>(7.49)   | 7.67<br>(7.56)   | 7.85<br>(6.57)   | € 6990<br>(5806)                       | € 7144<br>(5254)     | € 7108<br>(5487)     | € 6197<br>(3099) |
|                     | T2DM vs. Non-DM | 8.09%                   | 17.50%           | 7.56%            | 2.29%            | 5.14%                                  | 2.26%                | -2.21%               | -3.99%           |
|                     | p-value         | <b>&lt;0.001</b>        | <b>&lt;0.001</b> | <b>&lt;0.001</b> | <b>&lt;0.001</b> | <b>&lt;0.001</b>                       | <b>0.045</b>         | 0.985                | <b>0.028</b>     |
| Non-fatal stroke    | N*              | 2182                    | 3949             | 6945             | 7026             | 2182                                   | 3949                 | 6945                 | 7026             |
|                     | T2DM            | 9.02<br>(10.98)         | 8.61<br>(9.35)   | 8.70<br>(8.72)   | 8.67<br>(8.83)   | € 5901<br>(5926)                       | € 5806<br>(5897)     | € 5701<br>(4301)     | € 5518<br>(3031) |
|                     | Non-DM          | 9.16<br>(13.32)         | 8.84<br>(12.33)  | 8.77<br>(9.67)   | 8.58<br>(8.34)   | € 6283<br>(7833)                       | € 6089<br>(6250)     | € 6109<br>(5502)     | € 5593<br>(3299) |
|                     | T2DM vs. Non-DM | -1.53%                  | -2.60%           | -0.80%           | 1.05%            | -6.08%                                 | -4.65%               | -6.69%               | -1.35%           |
|                     | p-value         | 0.132                   | <b>&lt;0.001</b> | <b>0.024</b>     | 0.209            | <b>&lt;0.001</b>                       | <b>0.001</b>         | 0.873                | 0.750            |
| Unstable angina     | N*              | 329                     | 563              | 682              | 508              | 329                                    | 563                  | 682                  | 508              |
|                     | T2DM            | 4.39<br>(3.46)          | 4.85<br>(4.58)   | 5.23<br>(4.67)   | 5.72<br>(4.85)   | € 3341<br>(1449)                       | € 3494<br>(1831)     | € 3385<br>(1278)     | € 3298<br>(1248) |
|                     | Non-DM          | 4.08<br>(3.73)          | 4.36<br>(3.94)   | 5.07<br>(4.84)   | 5.30<br>(4.31)   | € 3334<br>(2309)                       | € 3203<br>(1413)     | € 3369<br>(2162)     | € 3309<br>(1465) |
|                     | T2DM vs. Non-DM | 7.60%                   | 11.24%           | 3.16%            | 7.92%            | 0.20%                                  | 9.07%                | 0.47%                | -0.34%           |
|                     | p-value         | 0.134                   | 0.071            | 0.462            | 0.162            | <b>0.002</b>                           | <b>&lt;0.001</b>     | <b>&lt;0.001</b>     | 0.134            |
| Heart failure       | N*              | 1997                    | 5200             | 12 779           | 20 708           | 1997                                   | 5200                 | 12 779               | 20 708           |
|                     | T2DM            | 9.16<br>(8.37)          | 8.86<br>(7.39)   | 8.52<br>(7.37)   | 7.86<br>(6.47)   | € 5159<br>(3592)                       | € 5040<br>(4166)     | € 4664<br>(2835)     | € 4393<br>(1499) |
|                     | Non-DM          | 10.20<br>(15.30)        | 9.59<br>(10.19)  | 8.99<br>(8.71)   | 8.03<br>(6.83)   | € 6206<br>(9048)                       | € 5575<br>(6998)     | € 4818<br>(3770)     | € 4414<br>(1845) |
|                     | T2DM vs. Non-DM | -10.20%                 | -7.61%           | -5.23%           | -2.12%           | -16.87%                                | -9.59%               | -3.19%               | -0.47%           |

|                          | p-value                | 0.704            | 0.640            | <b>0.039</b>     | 0.319          | 0.730            | 0.136            | <b>0.002</b>         | <b>0.000</b>     |
|--------------------------|------------------------|------------------|------------------|------------------|----------------|------------------|------------------|----------------------|------------------|
| <b>Revascularisation</b> | <b>N*</b>              | 4789             | 6229             | 6327             | 2709           | 4789             | 6229             | 6327                 | 2709             |
|                          | <b>T2DM</b>            | 6.60<br>(7.02)   | 8.00<br>(8.96)   | 8.85<br>(9.68)   | 8.24<br>(7.58) | € 8794<br>(7029) | € 9399<br>(7060) | € 9883<br>(7642)     | € 8874<br>(5836) |
|                          | <b>Non-DM</b>          | 5.98<br>(6.90)   | 7.50<br>(11.95)  | 8.55<br>(10.73)  | 8.24<br>(9.01) | € 8477<br>(8228) | € 9439<br>(9650) | € 10 413<br>(10 404) | € 9453<br>(7896) |
|                          | <b>T2DM vs. Non-DM</b> | 10.4%            | 6.7%             | 3.5%             | 0.00%          | 3.74%            | -0.42%           | -5.09%               | -6.13%           |
|                          | <b>p-value</b>         | <b>&lt;0.001</b> | <b>&lt;0.001</b> | <b>&lt;0.001</b> | 0.050          | <b>0.000</b>     | <b>0.000</b>     | <b>0.006</b>         | 0.343            |

\*The table shows the number of hospital discharges for the T2DM group. Results corresponding to the matched cohorts, so the number of hospital discharges in the T2DM and Non-DM group is the same.

CV, cardiovascular; DM, diabetes mellitus; LOHS, length of hospital stay; T2DM, type 2 diabetes mellitus; AMI, acute myocardial infarction; SD, standard deviation.

**Table A5.** LOHS and APR-DRG direct costs of hospital discharges attributable to CV complications by DM status and sex – Matched T2DM and Non-DM groups–

|                     |                 | Sex                  |                  |                                        |                  |
|---------------------|-----------------|----------------------|------------------|----------------------------------------|------------------|
|                     |                 | Men                  |                  | Women                                  |                  |
|                     |                 | LOHS [days] mean(SD) |                  | Direct costs APR-DRG [euros] mean (SD) |                  |
| Death from CV cause | N*              | 3914                 | 4344             | 3914                                   | 4344             |
|                     | T2DM            | 9.19<br>(10.86)      | 8.38<br>(10.00)  | € 8079<br>(9087)                       | € 6562<br>(6201) |
|                     | Non-DM          | 10.17<br>(13.73)     | 8.69<br>(11.89)  | € 10 310<br>(15 218)                   | € 7091<br>(8804) |
|                     | T2DM vs. Non-DM | -9.64%               | -3.57%           | -21.64%                                | -7.46%           |
|                     | p-value         | <b>0.02</b>          | 0.794            | <b>&lt;0.001</b>                       | 0.513            |
| Non-fatal AMI       | N*              | 9920                 | 4275             | 9920                                   | 4275             |
|                     | T2DM            | 7.46<br>(6.73)       | 8.02<br>(6.80)   | € 7086<br>(5016)                       | € 6438<br>(3767) |
|                     | Non-DM          | 6.82<br>(7.25)       | 7.50<br>(7.43)   | € 7025<br>(5076)                       | € 6530<br>(4999) |
|                     | T2DM vs. Non-DM | 9.38%                | 6.93%            | 0.88%                                  | -1.40%           |
|                     | p-value         | <b>&lt;0.001</b>     | <b>&lt;0.001</b> | 0.117                                  | 0.069            |
| Non-fatal stroke    | N*              | 11 440               | 8662             | 11 440                                 | 8662             |
|                     | T2DM            | 8.60<br>(9.10)       | 8.85<br>(9.22)   | € 5836<br>(5004)                       | € 5472<br>(3725) |
|                     | Non-DM          | 8.78<br>(10.85)      | 8.73<br>(9.48)   | € 6145<br>(5815)                       | € 5678<br>(4662) |
|                     | T2DM vs. Non-DM | -2.05%               | 1.37%            | -5.03%                                 | -3.63%           |
|                     | p-value         | <b>&lt;0.001</b>     | <b>0.000</b>     | <b>0.033</b>                           | 0.088            |
| Unstable angina     | N*              | 1259                 | 823              | 1259                                   | 823              |
|                     | T2DM            | 5.11<br>(4.65)       | 5.13<br>(4.36)   | € 3406<br>(1469)                       | € 3356<br>(1468) |
|                     | Non-DM          | 4.81<br>(4.53)       | 4.73<br>(4.02)   | € 3379<br>(2050)                       | € 3190<br>(1500) |
|                     | T2DM vs. Non-DM | 6.24%                | 8.46%            | 0.81%                                  | 5.20%            |
|                     | p-value         | <b>0.04</b>          | 0.100            | <b>&lt;0.001</b>                       | <b>&lt;0.001</b> |
| Heart failure       | N*              | 19 718               | 20 966           | 19 718                                 | 20 966           |
|                     | T2DM            | 8.34<br>(7.09)       | 8.18<br>(6.91)   | € 4722<br>(2990)                       | € 4482<br>(2082) |
|                     | Non-DM          | 8.95<br>(9.31)       | 8.35<br>(7.72)   | € 4986<br>(4696)                       | € 4580<br>(3409) |
|                     | T2DM vs. Non-DM | -6.82%               | -2.03%           | -5.29%                                 | -2.14%           |
|                     | p-value         | <b>&lt;0.001</b>     | 0.407            | 0.891                                  | <b>&lt;0.001</b> |
| Revascularisation   | N*              | 15 049               | 5008             | 15 049                                 | 5008             |
|                     | T2DM            | 7.87<br>(8.66)       | 8.26<br>(8.58)   | € 9384<br>(7237)                       | € 9194<br>(6696) |



|  |                            |                  |                  |                  |                  |
|--|----------------------------|------------------|------------------|------------------|------------------|
|  | <b>Non-DM</b>              | 7.48<br>(10.37)  | 7.84<br>(9.65)   | € 9472<br>(9495) | € 9660<br>(9064) |
|  | <b>T2DM vs.<br/>Non-DM</b> | 5.21%            | 5.36%            | -0.93%           | -4.82%           |
|  | <b>p-value</b>             | <b>&lt;0.001</b> | <b>&lt;0.001</b> | <b>&lt;0.001</b> | 0.054            |

\*The table shows the number of hospital discharges for the T2DM group. Results corresponding to matched cohorts so the number of hospital discharges in the T2DM and Non-DM groups is the same.

CV, cardiovascular; DM, diabetes mellitus; LOHS, length of hospital stay; T2DM, type 2 diabetes mellitus; AMI, acute myocardial infarction; SD, standard deviation.
